# Supplementary material for: The role of humanities in the medical curriculum: medical students’ perspectives
Source: Research Square preprint supplement (doi:10.21203/rs.3.rs-72841/v2), 2020-12-07

***Supplementary figure 1:*** *Percentage of undergraduate applicants that are female, over the past 10 years. Created using data from: UCAS Analysis and Insights 2018 (10).*


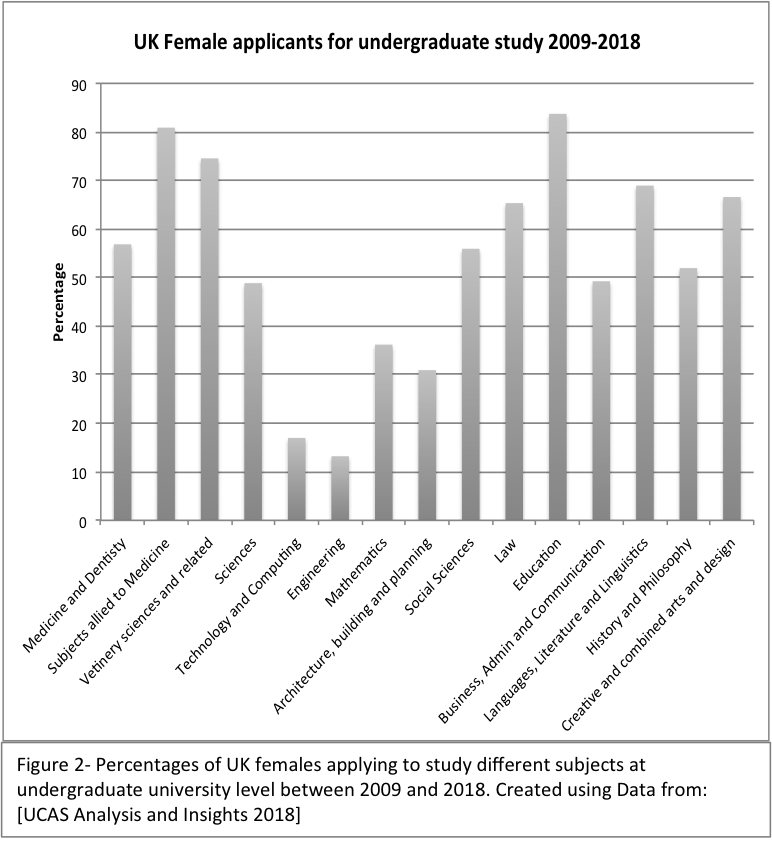


UK female applicants for undergraduate study 2009-2018


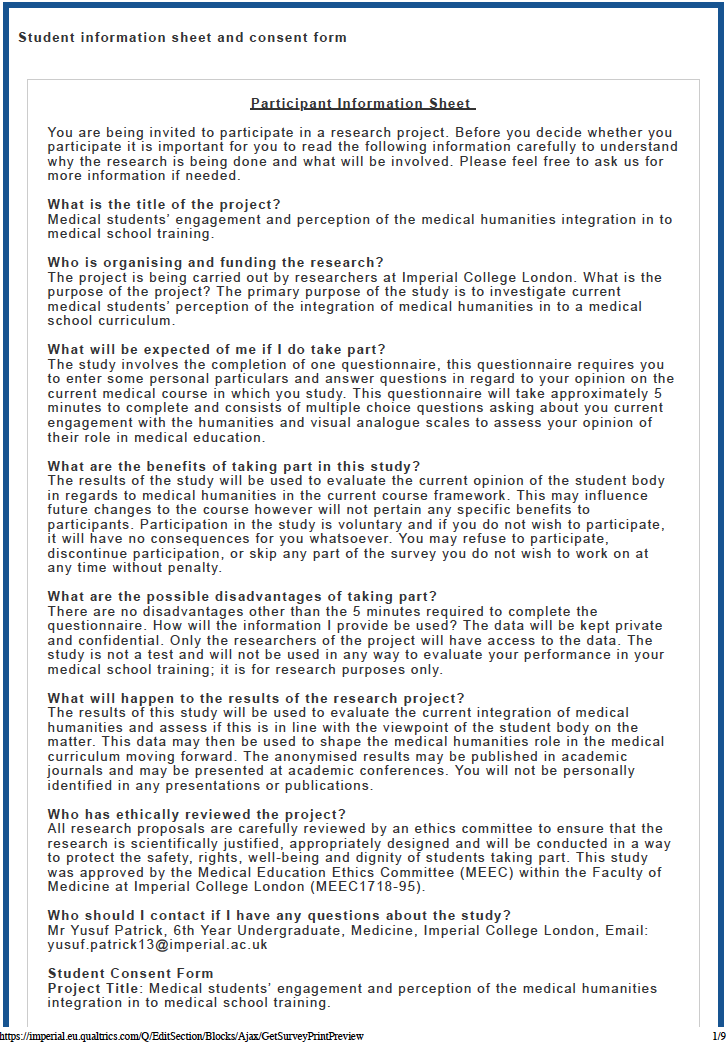

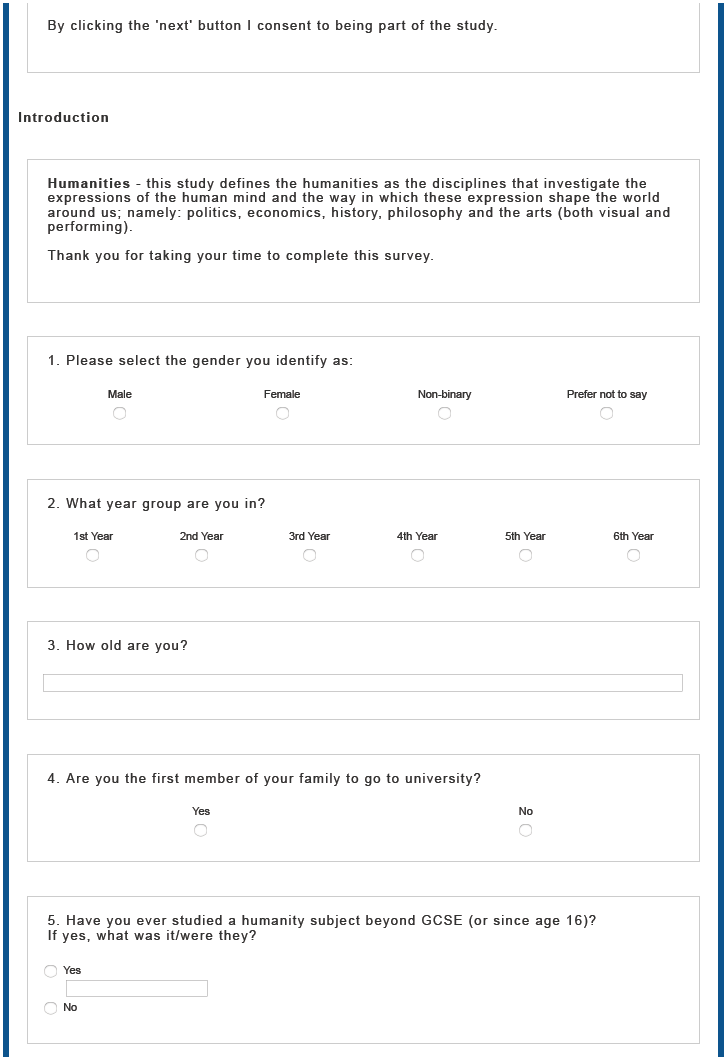

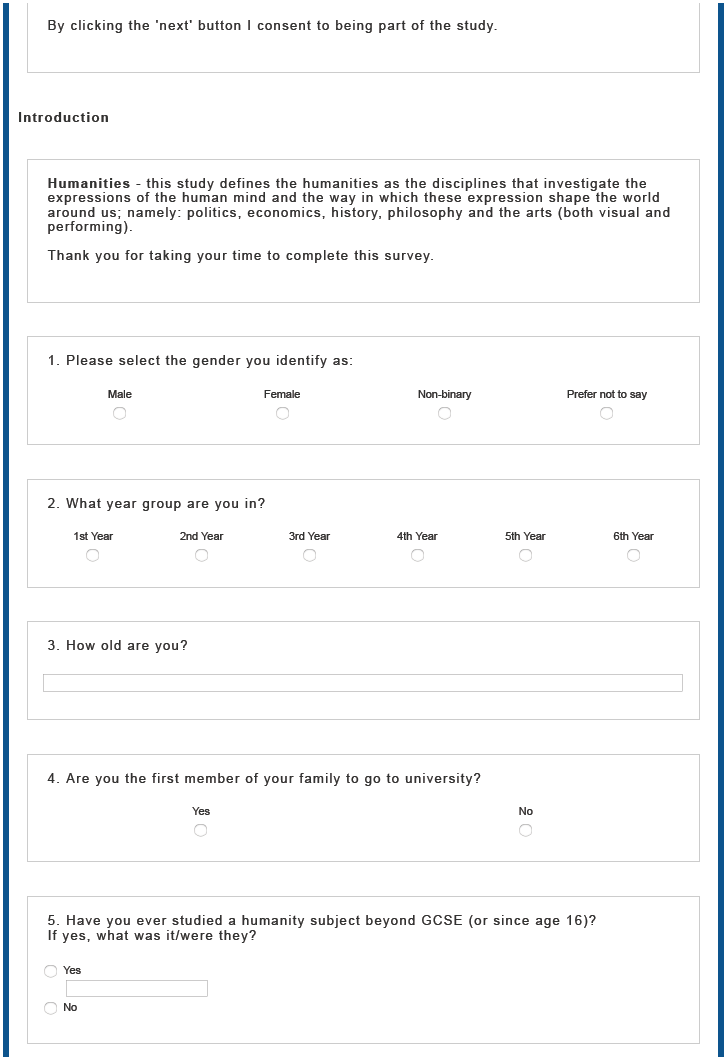


***Supplementary figure 2****: Questionnaire distributed to students using Qualtrics software.*


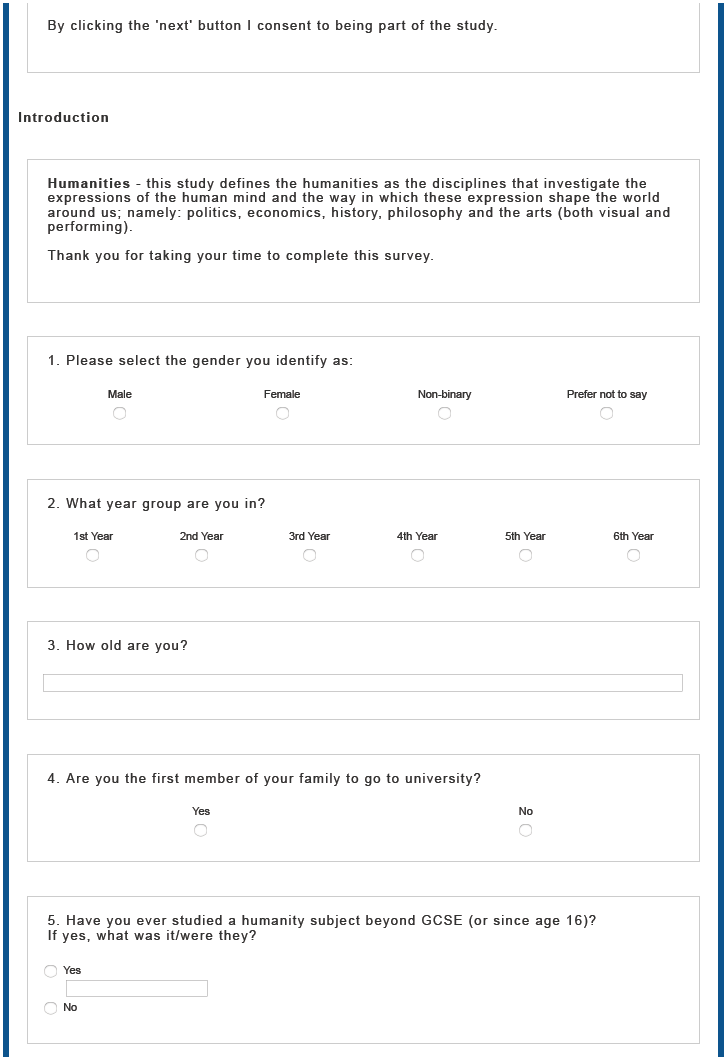

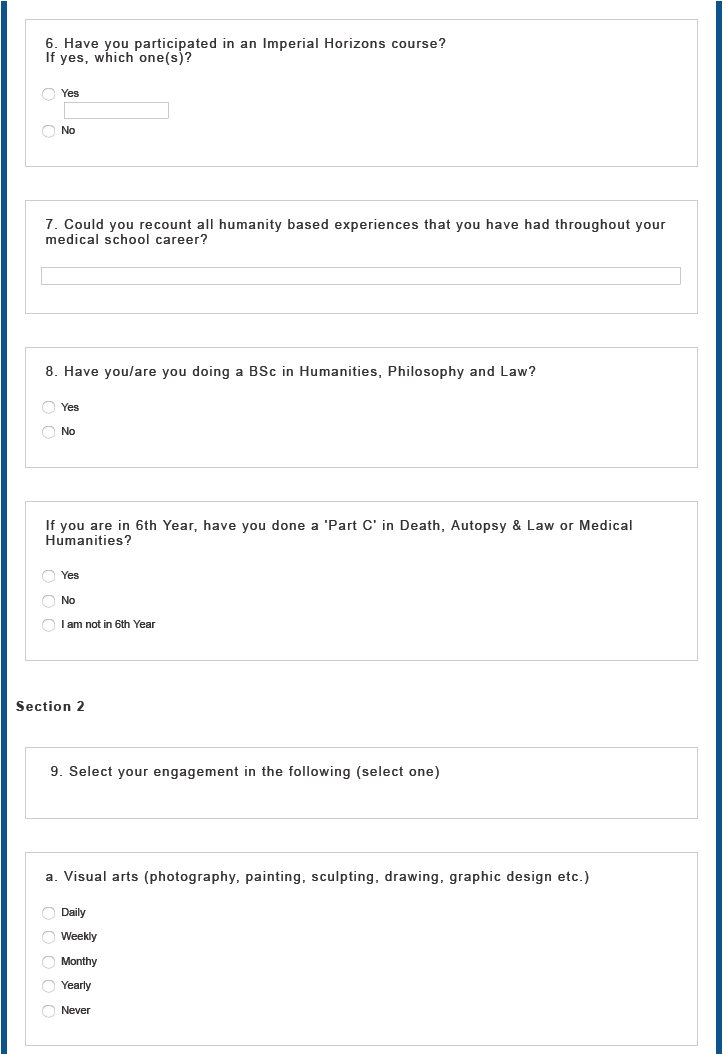

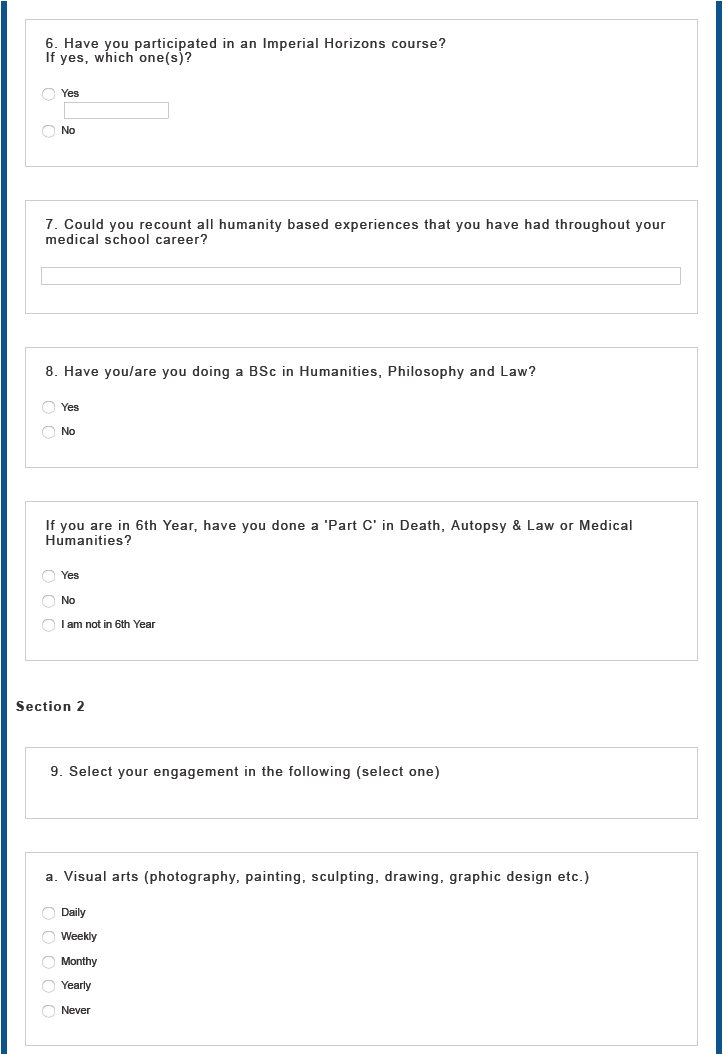

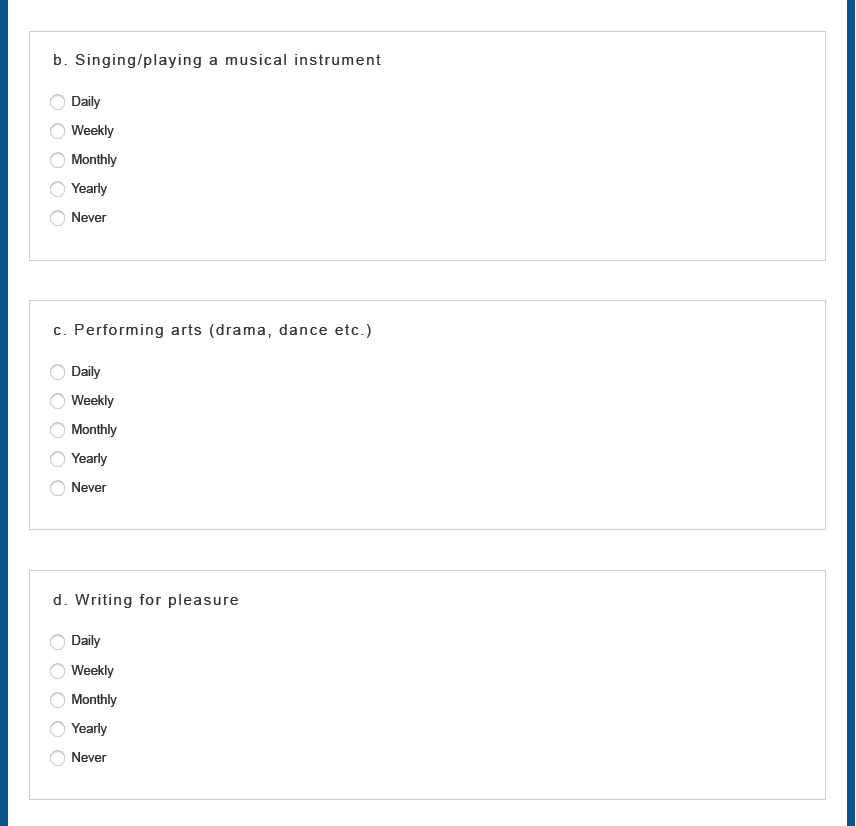

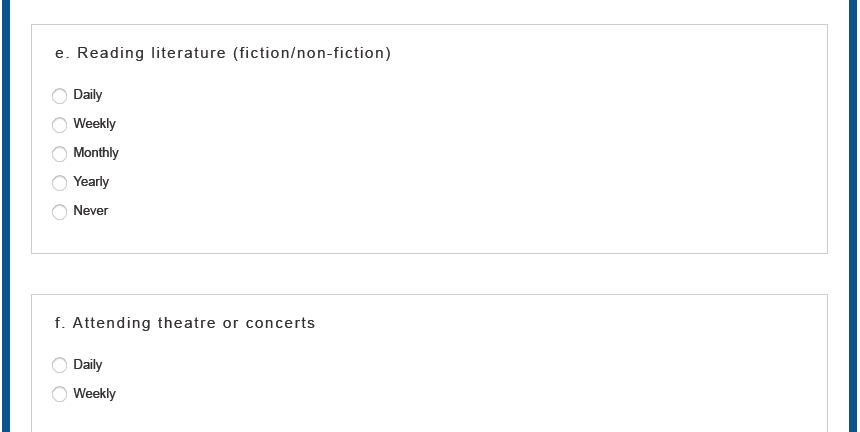

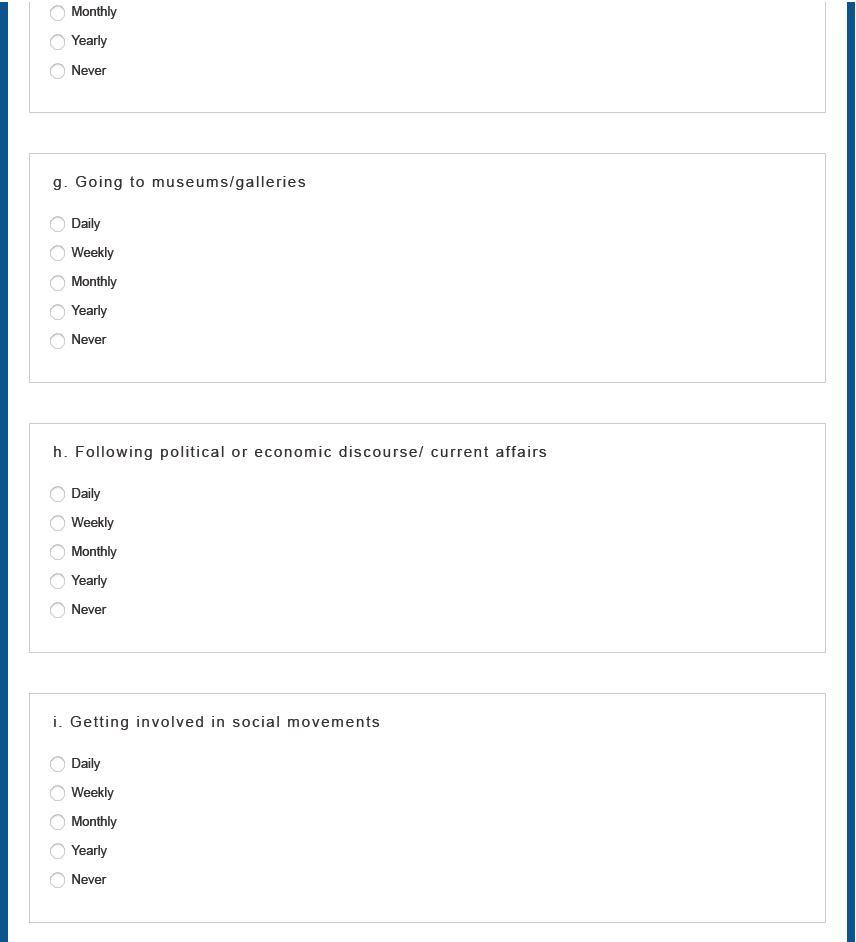

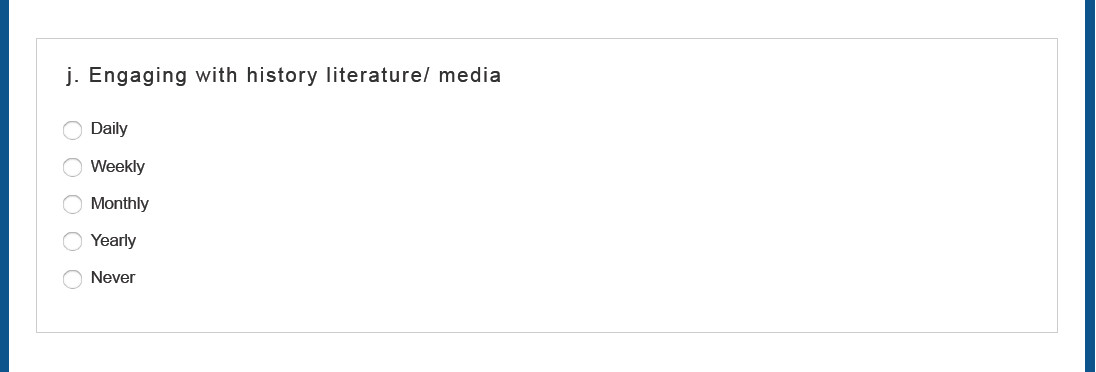

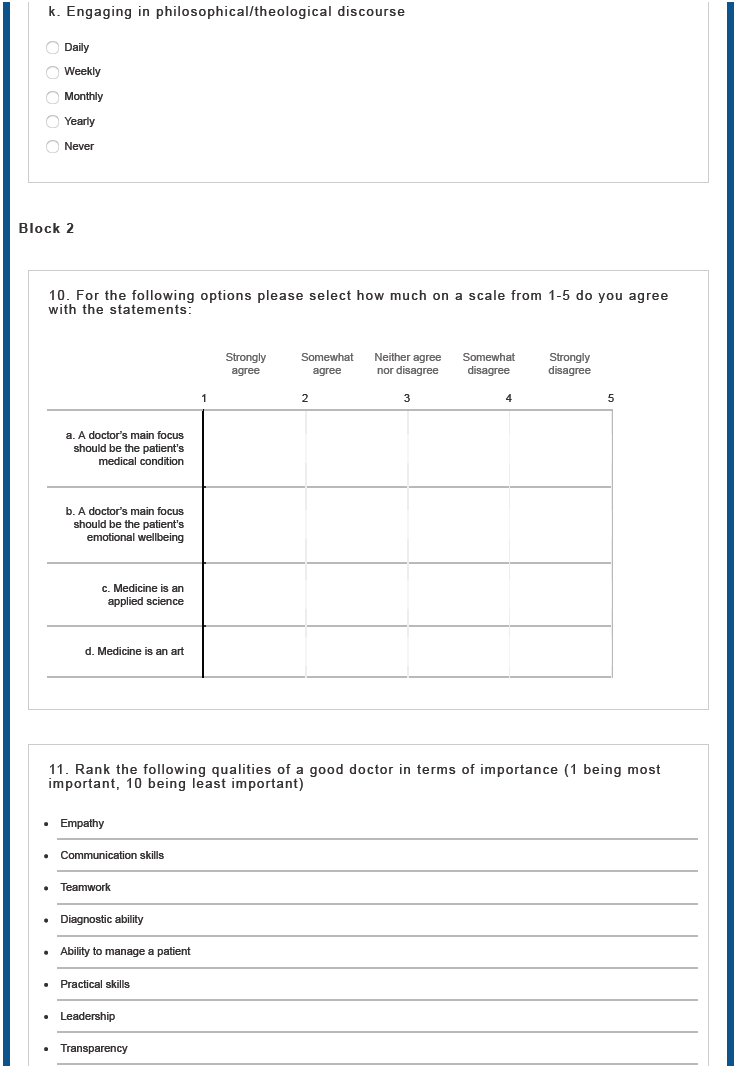

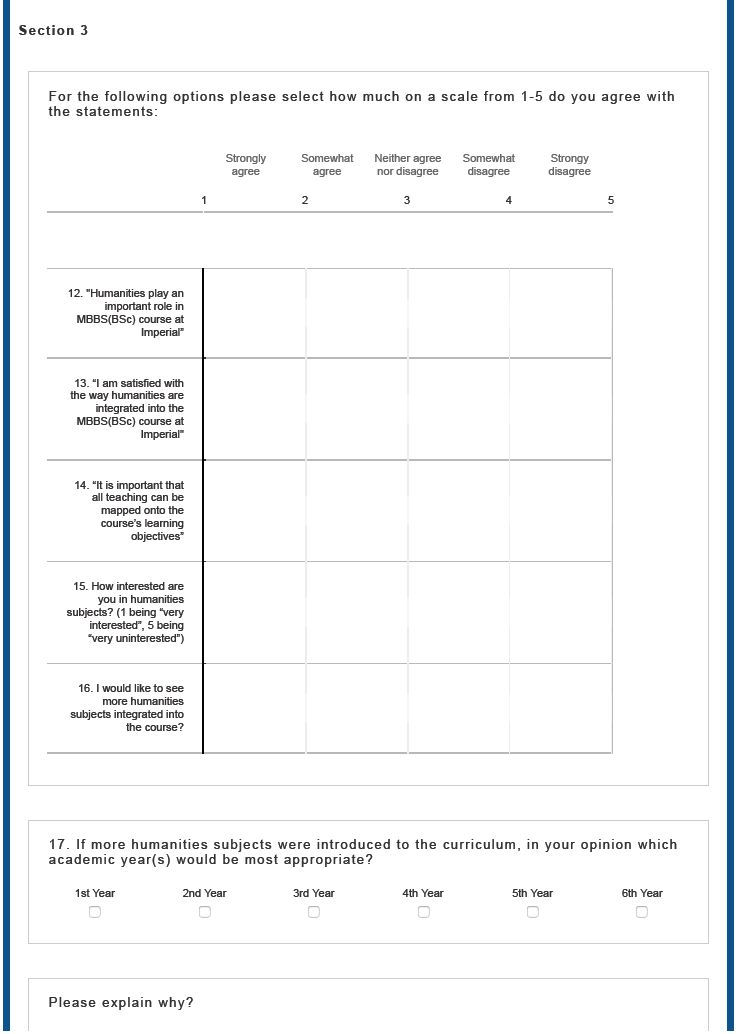

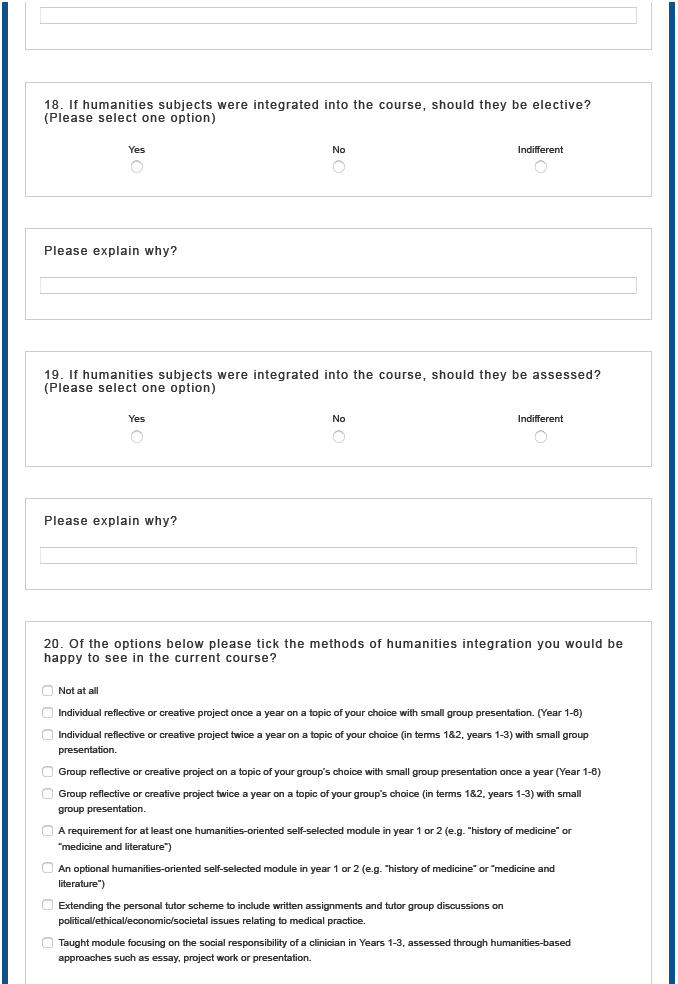

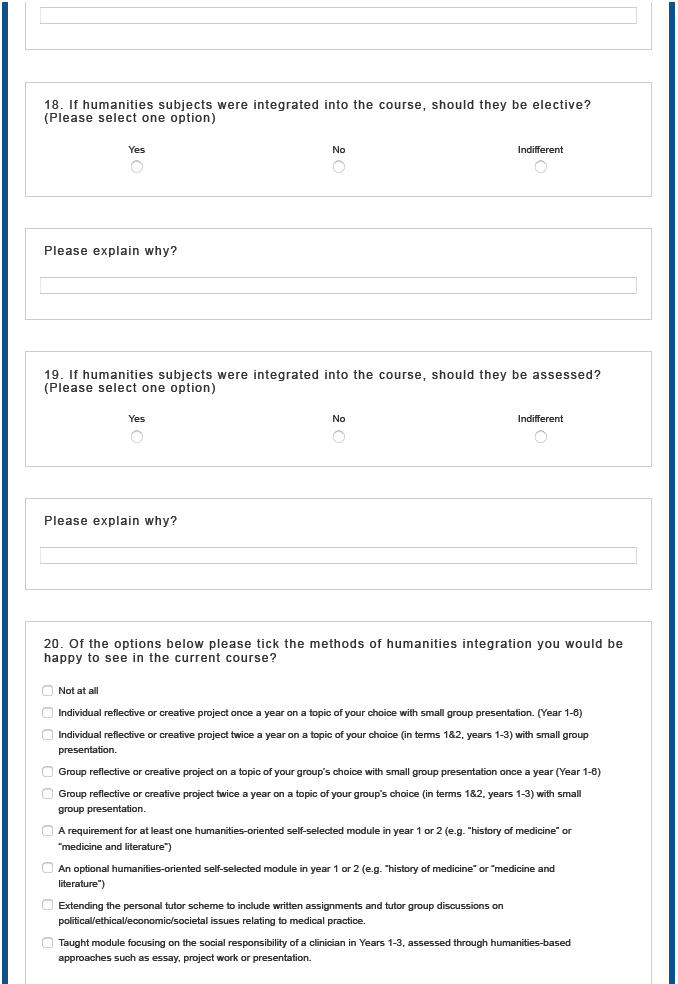

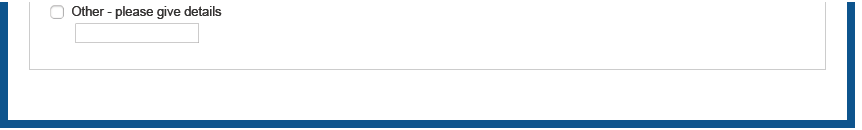

Supplement: Supplementary file 1 [file 678b2d688467f98ca18bfebb.docx]
